# Supplementary material for: High-Shear Wet Granulation of SMEDDS Based on Mesoporous Carriers for Improved Carvedilol Solubility
Source: MDPI journal article supplement (doi:10.3390/pharmaceutics14102077), 2022-09-29
Supplement: s1 [file s1]

# Supplementary Materials: High-Shear Wet Granulation of SMEDDS Based on Mesoporous Carriers for Improved Carvedilol Solubility

Mila Kovačević, Ilija German Ilić, Katarina Bolko Seljak and Alenka Zvonar Pobirk

**Table S1.** The results of SMEDDS granules characterization during formulation development: GD added per 6 g of carrier, % of povidone K25,  $d_{50}$  - median particle diameter, SPAN – particle size distribution and granules flow rate (expressed per 100g).

| Mesoporous carrier | GD added per 6 g of carrier (g) | % povidone K25 in GD | $d_{50}$ ( $\mu\text{m}$ ) | SPAN | Flow time (s) |
|--------------------|---------------------------------|----------------------|----------------------------|------|---------------|
| Syloid® 244FP      | 15.19                           | 2                    | 108                        | 7.4  | 7.4           |
|                    | 15.44                           | 4                    | 159                        | 5.2  | 5.2           |
|                    | 15.56                           | 6                    | 314                        | 5.7  | 5.7           |
|                    | 17.29                           | 7                    | 448                        | 8.8  | 8.8           |
|                    | 15.48                           | 10                   | 678                        | 8.9  | 8.9           |
|                    | 18.82                           | 12                   | 145                        | 8.9  | 8.9           |
|                    | 15.9                            | 13                   | 452                        | /    | /             |
|                    | 15.88                           | 16                   | 361                        | /    | /             |
|                    | 16.54                           | 18                   | 716                        | 5.9  | 5.9           |
| Neusilin® US2      | 19.7                            | 6                    | 330                        | 1.95 | 9.9           |
|                    | 19.72                           | 7                    | 529                        | 1.22 | 12.5          |
|                    | 19.09                           | 8                    | 165                        | 1.6  | 7.8           |
|                    | 18.08                           | 10                   | 219                        | 2.53 | 9.2           |
|                    | 19.09                           | 12                   | 189                        | 2.46 | 7.2           |
|                    | 19.45                           | 15                   | 360                        | 1.96 | 18.4          |
|                    | 20.27                           | 20                   | 602                        | 1.46 | 16.1          |
| Fujicalin® SG      | 13.25*                          | 2                    | 266                        | 2.33 | 6.2           |
|                    | 13*                             | 3                    | 233                        | 2.81 | 4.8           |
|                    | 16.35*                          | 4                    | 437                        | 1.19 | 7.15          |
|                    | 18.5*                           | 5                    | 609                        | 0.93 | 11.7          |
|                    | 13.55*                          | 7                    | 410                        | 1.88 | 6.0           |
|                    | 12.93*                          | 10                   | 751                        | 0.47 | 5.9           |
| Syloid® XDP 3050   | 13.77                           | 5                    | 58.8                       | 0.97 | 7.0           |
|                    | 13.63                           | 6                    | 56.4                       | 0.88 | 7.2           |
|                    | 14.83                           | 7                    | 60.9                       | 0.94 | $\infty$      |
|                    | 15.48                           | 10                   | 106                        | 2.39 | /             |
|                    | 15.72                           | 15                   | 351                        | 1.78 | 26.7          |
|                    | 15.65                           | 17                   | 340                        | 1.66 | /             |
|                    | 15.62                           | 20                   | 723                        | 1.18 | 15.8          |
|                    | 15.45                           | 25                   | 791                        | 1.25 | 13.5          |
|                    | 15.38                           | 30                   | 879                        | 1.06 | /             |
| Aeroperl® 300      | 15.25                           | 10                   | 332                        | 2.56 | 8.4           |
|                    | 15.23                           | 15                   | 623                        | 0.84 | 7.9           |
|                    | 15.58                           | 17                   | 710                        | 0.78 | 9.1           |
|                    | 15.62                           | 20                   | 602                        | 0.93 | 16.1          |

\*GD added per 20 g of carrier (g).

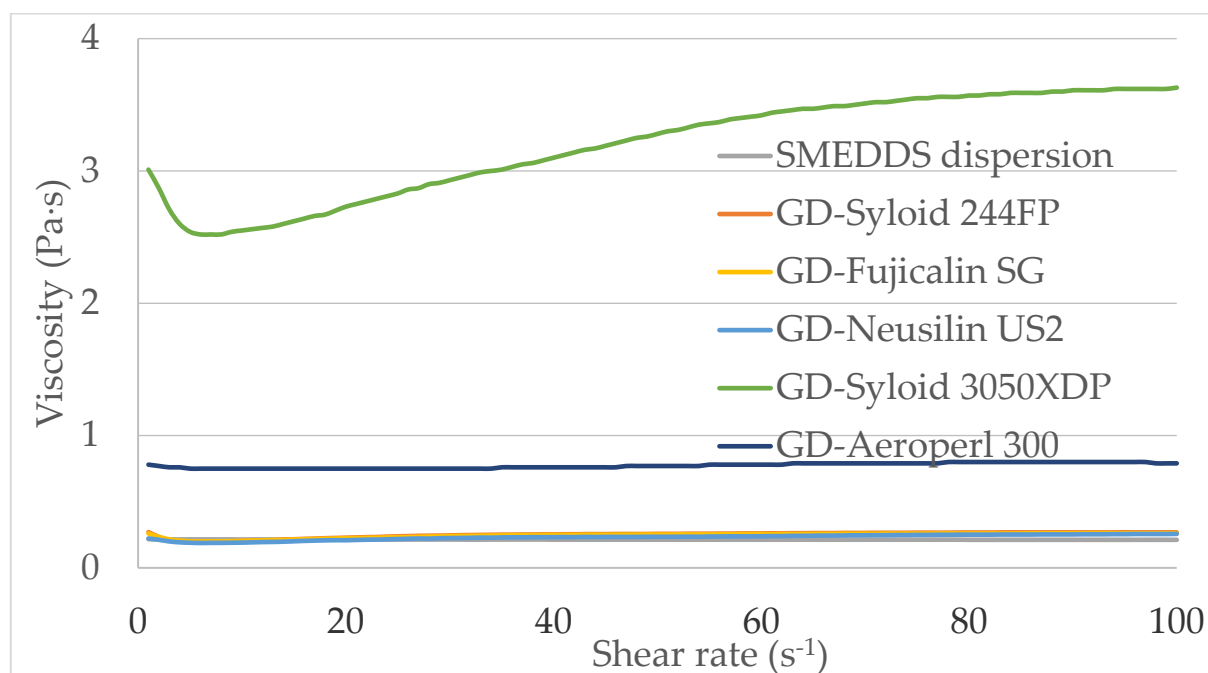

**Figure S1.** Viscosity of GD used for preparation of optimal products with corresponding mesoporous carriers, depending on the type of mesoporous carrier used. .

**Table S2.** Viscosity of GD used for preparation of optimal products with corresponding mesoporous carriers, determined at shear rate of  $1 \text{ s}^{-1}$ . GD consisted of SMEDDS dispersion (70 % SMEDDS and 30 % water) and binder povidone K25.

| Sample              | % povidone K25 | Viscosity (Pa·s) |
|---------------------|----------------|------------------|
| SMEDDS dispersion   | 0              | 0.62             |
| GD-Syloid® 244FP    | 7              | 0.67             |
| GD-Neusilin® US2    | 7              | 0.62             |
| GD-Fujicalin® SG    | 5              | 0.66             |
| GD-Syloid® 3050 XDP | 25             | 3.41             |
| GD-Aeroperl® 300    | 15             | 1.18             |

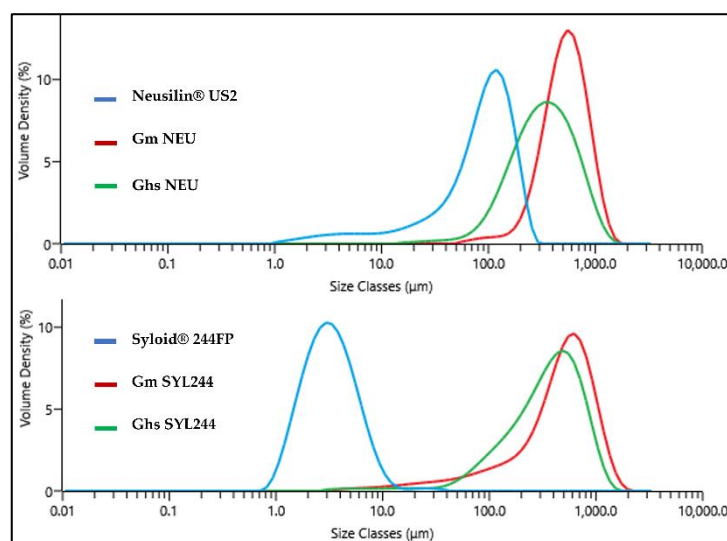

**Figure S2.** Particle size distribution of each mesoporous carrier, granules produces manually and in HS granulator, with Syloid® 244FP and Neusilin® US2.

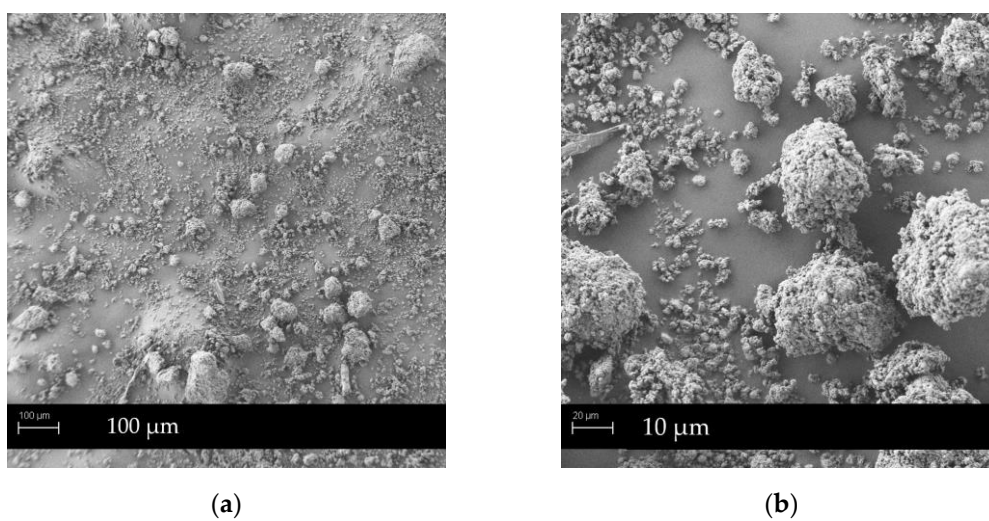

**Figure S3.** SEM images of G<sub>m</sub> SYL<sub>244</sub>: (a) under magnification 200x; (b) under magnification 1000x.

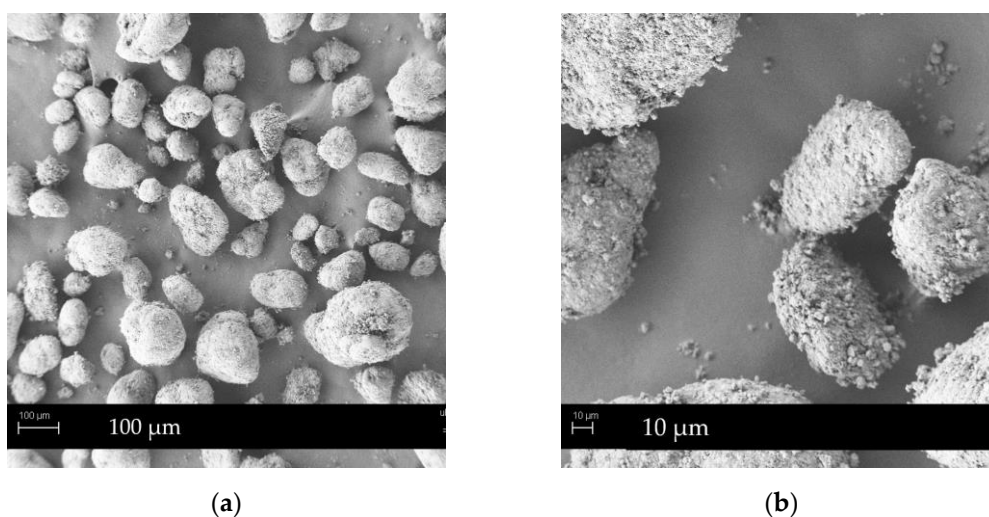

**Figure S4.** SEM images of G<sub>hs</sub> SYL<sub>244</sub>: (a) under magnification 200x; (b) under magnification 1000x.

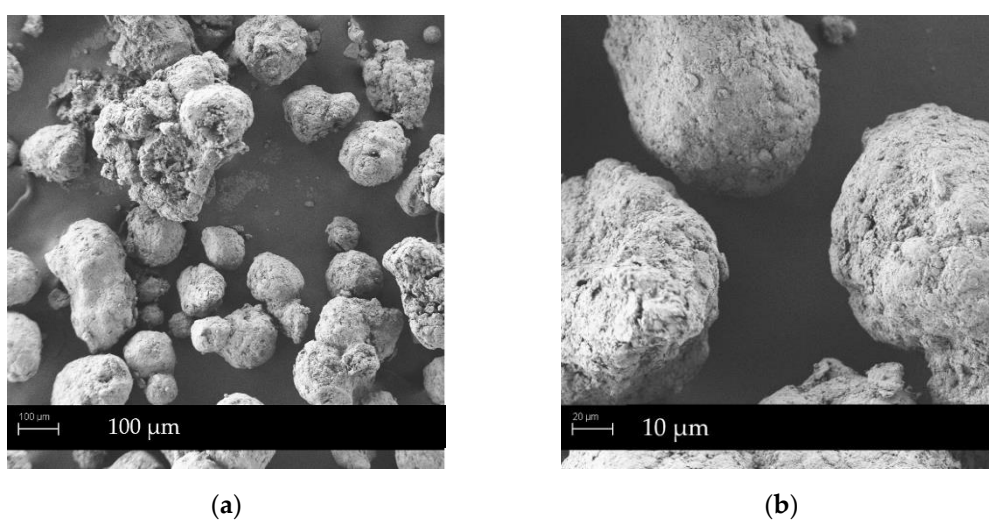

**Figure S5.** SEM images of G<sub>m</sub> FUJ: (a) under magnification 200x; (b) under magnification 1000x.

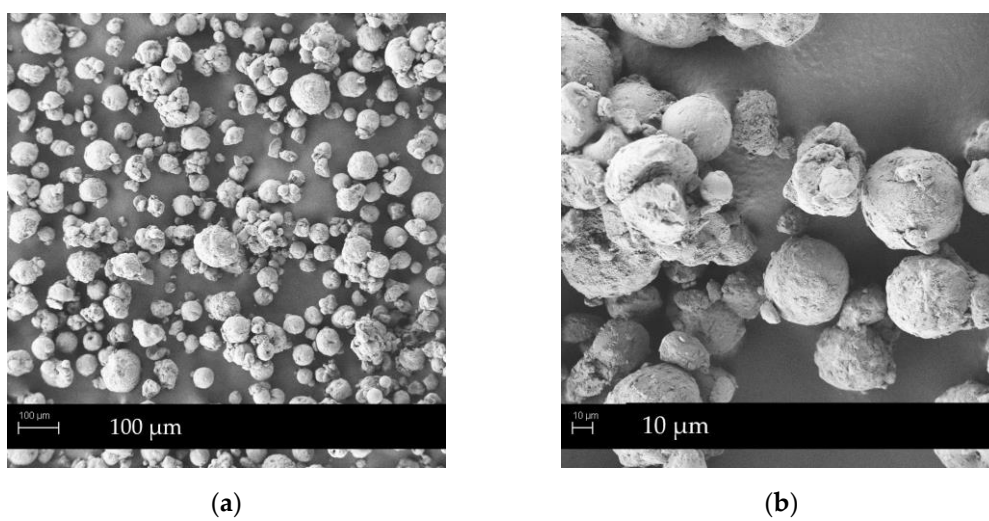

**Figure S6.** SEM images of G<sub>m</sub> AER: (a) under magnification 200x; (b) under magnification 1000x.

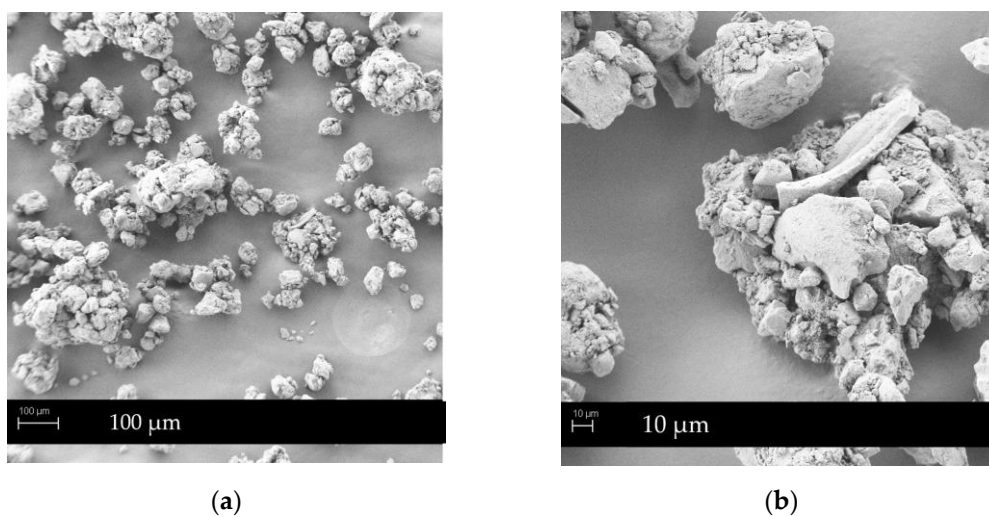

**Figure S7.** SEM images of G<sub>m</sub> SYL<sub>3050</sub>: (a) under magnification 200x; (b) under magnification 1000x.
